# Supplementary material
Source: PubMed Central journal article supplement (PMC7391158)

## Supplemental Materials:

**A refined cell-of-origin classifier with targeted NGS and Artificial Intelligence shows robust predictive value in DLBCL**

**Supplemental Data File with two worksheets.xlsx**

**Supplemental Table S1.** RNA quality control metrics

| <b>QC Metrics</b>                               | <b>Acceptance Criteria</b>                                                |
|-------------------------------------------------|---------------------------------------------------------------------------|
| RNA integrity                                   | 28s:18s rRNA ratio (Agilent 4200 tape station) (RIN): from 2 to 5         |
| Total number of reads (limit of detection, LoD) | > 5 million reads                                                         |
| Base Quality                                    | > 80% of bases with QS above > Q30                                        |
| Percent Mapped to coding                        | > 60%                                                                     |
| Mean Insert size                                | 130-160 (bp)                                                              |
| Coverage                                        | > 10 ×                                                                    |
| % Cluster passing                               | The percent cluster passing filter (Cluster PF) > 80%                     |
| % Reads passing filter                          | The percent reads passing filter (Reads PF) > 80%                         |
| Positive Run Control                            | Mean expression level of the Universal Human Control =220±18 (Mean ± 2SD) |
| Limit of Blank (LoD)                            | < 1 ng at library preparation                                             |
| % of duplicate reads                            | < 40%                                                                     |

**Supplemental Table S2.** Biomarkers showing differential distribution in the new GCB/ABC groups defined in the current study

| <b>Biomarker enriched in GCB or ABC</b>       | <b>P value</b> |
|-----------------------------------------------|----------------|
| <b>Higher frequency in GCB vs ABC</b>         |                |
| <i>BCL2</i> gene rearrangement                | $P < 0.0001$   |
| <i>MYC/BCL2</i> genetic double-hit            | $P = 0.009$    |
| BCL6+ expression                              | $P < 0.0001$   |
| CD10+ expression                              | $P < 0.0001$   |
| CTLA-4+ cell % in T cells                     | $P = 0.005$    |
| GCET1+ expression                             | $P < 0.0001$   |
| <i>PTEN</i> gene deletion                     | $P = 0.01$     |
| CDKN2A p16+ expression                        | $P = 0.014$    |
| SSBP2+ expression                             | $P < 0.0001$   |
| <b>Higher frequency in ABC vs GCB</b>         |                |
| BCL2+ expression                              | $P = 0.002$    |
| <i>BCL6</i> gene rearrangement                | $P = 0.002$    |
| CXCR4+ expression                             | $P = 0.014$    |
| CD5+ expression                               | $P < 0.0001$   |
| CD37+ expression                              | $P = 0.039$    |
| FOXP1 high expression                         | $P < 0.0001$   |
| IgM+ expression                               | $P < 0.0001$   |
| JUNB high expression                          | $P = 0.002$    |
| MUM1+ expression                              | $P < 0.0001$   |
| MYC+/BCL2+ double expression                  | $P = 0.006$    |
| NFKB1 p50+ expression                         | $P = 0.001$    |
| CDKN1A/p21+ expression                        | $P = 0.003$    |
| PD-L1 positive expression in B cells          | $P < 0.0001$   |
| High PD-L1+ cell % in B cells                 | $P = 0.007$    |
| PD-L1 expression (by PD-L1+%) in CD4+ T cells | $P = 0.001$    |
| PD-L1 expression (by PD-L1+%) in CD8+ T cells | $P < 0.0001$   |
| PD-L1 expression (by PD-L1+%) in NK cells     | $P = 0.001$    |
| PRDM1+ expression                             | $P < 0.0001$   |
| STAT3 high expression                         | $P = 0.001$    |

**Supplemental Figure S1.** A flow chart for the current study applying NGS and Artificial Intelligence (AI) in DLBCL model construction

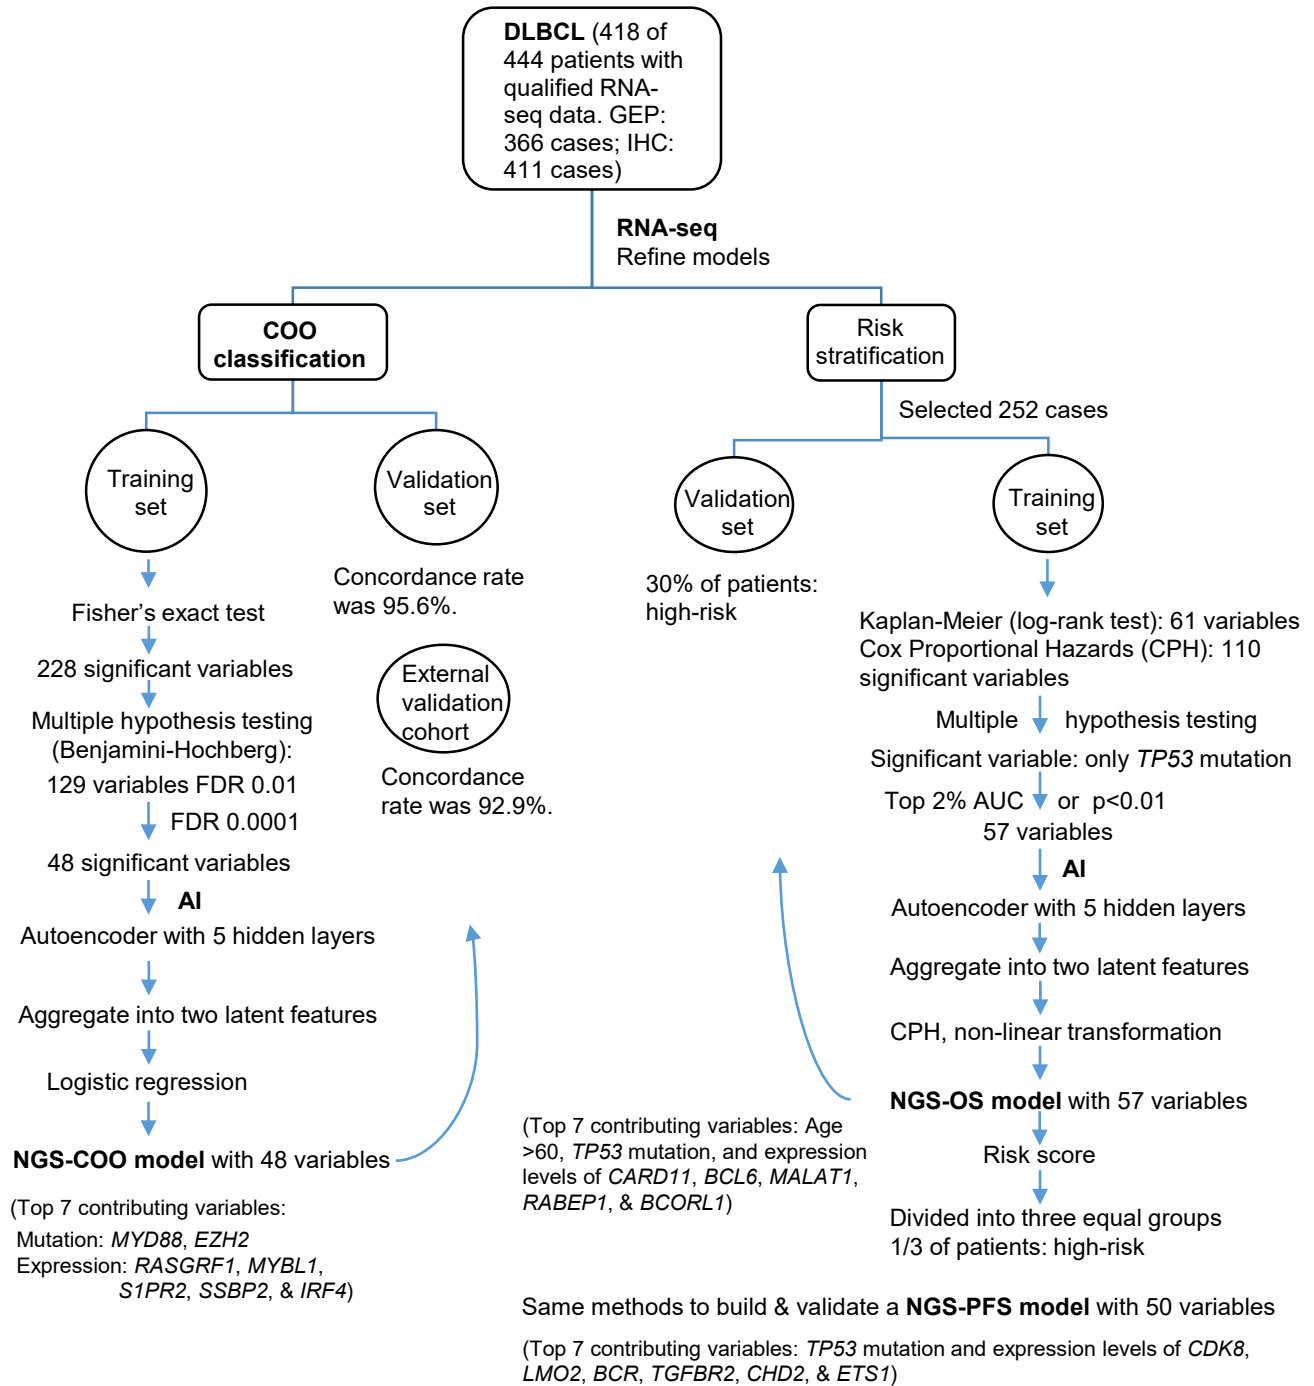

Supplement: advancesADV2020001949-suppl1.pdf [file advancesADV2020001949-suppl1.pdf]
